# Supplementary material
Source: HighWire-hosted journal article supplement (https://erj.ersjournals.com/content/57/1/2001346)
Supplement: inline-supplementary-material-1 [file inline-supplementary-material-1.pdf]

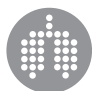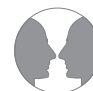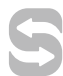

SHAREABLE PDF

# Serum mitochondrial DNA predicts the risk of acute exacerbation and progression of idiopathic pulmonary fibrosis

Koji Sakamoto<sup>1,5</sup>, Taiki Furukawa<sup>2,5</sup>, Yasuhiko Yamano<sup>3</sup>, Kensuke Kataoka<sup>3</sup>, Ryo Teramachi<sup>1</sup>, Anjali Walia<sup>4</sup>, Atsushi Suzuki<sup>1</sup>, Masahide Inoue<sup>1</sup>, Yoshio Nakahara<sup>1</sup>, Changwan Ryu<sup>4</sup>, Naozumi Hashimoto<sup>1</sup> and Yasuhiro Kondoh<sup>3</sup>

**Affiliations:** <sup>1</sup>Dept of Respiratory Medicine, Nagoya University Graduate School of Medicine, Nagoya, Japan. <sup>2</sup>Dept of Medical IT Center, Nagoya University Hospital, Nagoya, Japan. <sup>3</sup>Dept of Respiratory and Allergy, Tosei General Hospital, Seto, Japan. <sup>4</sup>Section of Pulmonary, Critical Care, and Sleep Medicine, Yale University School of Medicine, New Haven, CT, USA. <sup>5</sup>These authors contributed equally to this work.

**Correspondence:** Koji Sakamoto, Dept of Respiratory Medicine, Nagoya University Graduate School of Medicine, 65 Tsurumai-cho, Showa-ku, Nagoya 466-8550, Japan. E-mail: sakakoji@med.nagoya-u.ac.jp

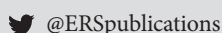

@ERSpublications

**Patients with IPF often suffer from acute exacerbation, an unpredictable and deadly complication. This study elucidated the potential of circulating mitochondrial DNA as a predictor of acute exacerbation and disease progression of IPF.** <https://bit.ly/3i0OSza>

**Cite this article as:** Sakamoto K, Furukawa T, Yamano Y, *et al.* Serum mitochondrial DNA predicts the risk of acute exacerbation and progression of idiopathic pulmonary fibrosis. *Eur Respir J* 2021; 57: 2001346 [<https://doi.org/10.1183/13993003.01346-2020>].

This single-page version can be shared freely online.

## To the Editor:

Idiopathic pulmonary fibrosis (IPF) is a progressive, fatal interstitial lung disease with a median survival of 3–5 years [1]. Its disease course is highly variable, as some patients experience rapid deterioration in lung function while others experience more gradual decline [2]. The development of acute exacerbation of IPF (AE-IPF), a highly lethal complication of unknown aetiology, has been shown to accelerate disease progression [3]. Presently, there are no accepted biomarkers that predict clinical deterioration [4], thus indicating an important, unmet need in the management of this devastating disease.
